# Supplementary material for: Effectiveness of Lifestyle Interventions during Pregnancy on Preventing Gestational Diabetes Mellitus in High-Risk Women: A Systematic Review and Meta-Analyses of Published RCTs
Source: MDPI journal article supplement (doi:10.3390/jcm12227038), 2023-11-10
Supplement: s1 [file s1]

**Effectiveness of lifestyle interventions during pregnancy on preventing gestational diabetes mellitus in high-risk women: a systematic review and meta-analyses of published RCTs**

Georgios I. Tsironikos<sup>1</sup>, Petros Potamianos<sup>2</sup>, George E. Zakynthinos<sup>3</sup>, Vasiliki Tsolaki<sup>4\*</sup>, Athina Tatsioni<sup>5</sup>, Alexandra Bargiota<sup>6</sup>

<sup>1</sup>Department of Medicine, University of Ioannina, University Campus, 45110 Ioannina, Greece, E-mail: gtsironikos@gmail.com

<sup>2</sup> Department of Gastroenterology, University Hospital of Larissa, Faculty of Medicine, University of Thessaly, Mezourlo, 41335 Larissa, Greece, E-mail: petpot92@gmail.com

<sup>3</sup> 3rd Department of Cardiology, "Sotiria" Chest Diseases Hospital, Medical School, National and Kapodistrian University of Athens, 11527 Athens, Greece, E-mail: gzakynthinos2@gmail.com

<sup>4</sup> Department of Critical Care, University Hospital of Larissa, Faculty of Medicine, University of Thessaly, Mezourlo, 41335 Larissa, Greece, E-mail: vasotsolaki@yahoo.com

<sup>5</sup> Department of Research Unit for General Medicine and Primary Health Care, University of Ioannina, University Campus, 45110 Ioannina, Greece, E-mail: atatsion@uoi.gr

<sup>6</sup> Department of Internal Medicine-Endocrinology, University Hospital of Larissa, Faculty of Medicine, University of Thessaly, Mezourlo, 41335 Larissa, Greece, E-mail: abargio@med.uth.gr

\*Corresponding Author

E-mail: vasotsolaki@yahoo.com

## Supplementary material

**Table S1. Search Strategy**

|         |                                                                                                                                                                                                                                                                                                                                                                        |
|---------|------------------------------------------------------------------------------------------------------------------------------------------------------------------------------------------------------------------------------------------------------------------------------------------------------------------------------------------------------------------------|
| PubMed  | ((diet OR nutrition) OR (exercise OR "physical activit*" OR workout)) AND (diabetes AND (gestational OR pregnancy)) AND ("Clinical Trials as Topic"[Mesh] OR "randomized controlled trial"[pt] OR "controlled clinical trial"[pt] OR randomized[tiab] OR placebo[tiab] OR randomly[tiab] OR trial[tiab])<br>with PubMed publication date Between Jan 1950 and Aug 2022 |
| CENTRAL | ((diet OR nutrition) OR (exercise OR "physical NEXT activit*" OR workout)) AND (diabetes AND (gestational OR pregnancy)) with Cochrane Library publication date Between Jan 1950 and Aug 2022 (Word variations have been searched)                                                                                                                                     |
| Scopus  | TITLE-ABS-KEY ( ( diet OR nutrition ) OR ( exercise OR "physical activit*" OR workout ) AND (diabetes AND ( gestational OR pregnancy ))) AND ( LIMIT-TO ( DOCTYPE , "ar" ) ) AND ( LIMIT-TO ( EXACTKEYWORD , "Female" ) OR LIMIT-TO ( EXACTKEYWORD , "Pregnancy" ) ) AND ( LIMIT-TO ( LANGUAGE , "English" ) ) AND ( EXCLUDE ( PUBYEAR , 2023 ) )                      |

**Table S2. Assessment of the exercise intervention based on CERT tool**

| <b>First author, Publication year, Country</b> | <b>1) Equipment</b> | <b>2) Provider</b> | <b>3) Performance</b>      | <b>4) Supervision</b> | <b>5) Adherence</b> | <b>6) Motivation</b> | <b>7) Progressing</b> | <b>8) Description, reproduction</b> | <b>9) Home component</b> | <b>10) Nonexercise components</b> | <b>11) Adverse events</b> | <b>12) Location</b>                                                  | <b>13) Dosage</b>                                                                 | <b>14) Tailoring to individual</b> | <b>15) Starting level</b> | <b>16) How well</b>                          |
|------------------------------------------------|---------------------|--------------------|----------------------------|-----------------------|---------------------|----------------------|-----------------------|-------------------------------------|--------------------------|-----------------------------------|---------------------------|----------------------------------------------------------------------|-----------------------------------------------------------------------------------|------------------------------------|---------------------------|----------------------------------------------|
| Do Nascimento, 2011, Brazil                    | ND                  | Physiotherapist    | In a group or individually | Supervised            | Exercise journal    | Counselling          | ND                    | ND                                  | Five times weekly        | Counselling on GWG, nutrition     | None reported             | Prenatal Outpatient Clinic of the Women's Integral Healthcare Centre | ACOG (2002); strengthened program of 40 min, light- to moderate-intensity, weekly | Generic                            | ND                        | 62.5% adherence and 60% 9 – 16 weeks home PA |
| Oostdam, 2012,                                 | Cycle erg           | Physiother         | Individually               | Supervised            | Accelerometer,      | Counselling          | Number of             | ND                                  | ND                       | ND                                | None reported             | Department of Physiothera                                            | Light intensity warming-                                                          | Training intensity carefully       | Maximal muscle strength   | Close supervision of a                       |

|                 |                                                                                                                                                                                                  |           |  |  |                                |  |                                                                    |  |  |  |  |                                          |                                                                                                                                                                                                                                                       |                                      |                                                                                                                                                                                                                                                         |                                                         |
|-----------------|--------------------------------------------------------------------------------------------------------------------------------------------------------------------------------------------------|-----------|--|--|--------------------------------|--|--------------------------------------------------------------------|--|--|--|--|------------------------------------------|-------------------------------------------------------------------------------------------------------------------------------------------------------------------------------------------------------------------------------------------------------|--------------------------------------|---------------------------------------------------------------------------------------------------------------------------------------------------------------------------------------------------------------------------------------------------------|---------------------------------------------------------|
| Netherl<br>ands | om<br>eter<br>s,<br>trea<br>dm<br>ills,<br>cro<br>ss-<br>trai<br>ner<br>s,<br>stat<br>ion<br>ary<br>ro<br>win<br>g<br>ma<br>chi<br>nes,<br>free<br>wei<br>ght<br>s,<br>acc<br>eler<br>om<br>eter | api<br>st |  |  | MET<br>from<br>the<br>ACS<br>M |  | repet<br>itions<br>, talk<br>test,<br>Borg<br>Scale<br>until<br>12 |  |  |  |  | py in the<br>participatin<br>g hospitals | up for 5–<br>10 min.,<br>such as<br>slow<br>cycling at<br>a level of<br>50 Watt.<br>40 min of<br>1 or 2<br>aerobic<br>exercises<br>and 4 to 6<br>strength<br>exercises.<br>Cool-<br>down for<br>5–10 min<br>by slowly<br>reducing<br>the<br>activity. | and individua<br>lly controlled<br>. | and aerobic<br>capacity,<br>Valsalva<br>maneuver<br>during<br>resistance<br>exercise,<br>one<br>Repetition<br>Maximu<br>m (1RM;<br>the<br>heaviest<br>weight<br>that can<br>be lifted<br>once)<br>predicted<br>from the<br>Oddvar<br>Holten<br>diagram. | physiot<br>herapist<br>under<br>the<br>guide of<br>ACOG |
|-----------------|--------------------------------------------------------------------------------------------------------------------------------------------------------------------------------------------------|-----------|--|--|--------------------------------|--|--------------------------------------------------------------------|--|--|--|--|------------------------------------------|-------------------------------------------------------------------------------------------------------------------------------------------------------------------------------------------------------------------------------------------------------|--------------------------------------|---------------------------------------------------------------------------------------------------------------------------------------------------------------------------------------------------------------------------------------------------------|---------------------------------------------------------|

|                  |                                                                                       |            |                                  |            |                                                                               |    |                                                         |    |    |                |                                                                                                            |    |                                                                                                                                                                                                                                                                                                           |         |                                                                                                                                                   |                                                    |
|------------------|---------------------------------------------------------------------------------------|------------|----------------------------------|------------|-------------------------------------------------------------------------------|----|---------------------------------------------------------|----|----|----------------|------------------------------------------------------------------------------------------------------------|----|-----------------------------------------------------------------------------------------------------------------------------------------------------------------------------------------------------------------------------------------------------------------------------------------------------------|---------|---------------------------------------------------------------------------------------------------------------------------------------------------|----------------------------------------------------|
| Price, 2012, USA | Treadmills, elliptical trainers, stationary bicycles, weight machines, exercise balls | Researches | Both in a group and individually | Supervised | Borg Scale, temperature and humidity rates, sit-and-reach test, questionnaire | ND | A program at moderate intensity (12 – 14 on Borg Scale) | ND | ND | Dietary advice | Intervention Group: anxiety with exercise (n = 1), preterm pregnancy (n = 1), pain from leiomyomas (n = 1) | ND | ACOG; aerobic training of 45 – 60 min, 4 times per week, at moderate intensity. Step aerobics on the 1 <sup>st</sup> day, walked as a group on the 2 <sup>nd</sup> day, and circuit training on a 3 <sup>rd</sup> day, of 1–10 min of aerobic exercise, alternating with an equal time interval of weight | Generic | Aerobic fitness test, submaximal strength assessment by lifting a 7-kg medicine ball from floor to waist high as many times possible within 1 min | Author's log of exercise activities and attendance |
|------------------|---------------------------------------------------------------------------------------|------------|----------------------------------|------------|-------------------------------------------------------------------------------|----|---------------------------------------------------------|----|----|----------------|------------------------------------------------------------------------------------------------------------|----|-----------------------------------------------------------------------------------------------------------------------------------------------------------------------------------------------------------------------------------------------------------------------------------------------------------|---------|---------------------------------------------------------------------------------------------------------------------------------------------------|----------------------------------------------------|

|                      |                      |                     |            |            |                        |                                             |                             |    |    |    |                         |                               |                                                                                                                                                                                               |                  |    |                                                       |
|----------------------|----------------------|---------------------|------------|------------|------------------------|---------------------------------------------|-----------------------------|----|----|----|-------------------------|-------------------------------|-----------------------------------------------------------------------------------------------------------------------------------------------------------------------------------------------|------------------|----|-------------------------------------------------------|
|                      |                      |                     |            |            |                        |                                             |                             |    |    |    |                         |                               | training, using a weight that allowed one set of 20 repetitions. End with 5 min of hamstring , quadriceps, and calf stretching . Also, a brisk walk individually, 30- to 60-min, once weekly. |                  |    |                                                       |
| Barakat, 2013, Spain | Barbell, the rab and | Fitness specialist, | In a group | Supervised | HR monitor, Borg Scale | Music, and airy, well-lighted exercise room | Moderate exercise intensity | ND | ND | ND | Under medical follow-up | Exercise room at the Hospital | 3 days/week, 50–55 min/session. Warm-up and cool-                                                                                                                                             | One size fit all | ND | Training sessions in a group of 10–12 women, carefull |

|  |                             |                          |  |  |  |                        |  |  |  |  |  |  |                                                                                                                                                                                                                                                                                                                                                |  |  |                                                                                                                            |
|--|-----------------------------|--------------------------|--|--|--|------------------------|--|--|--|--|--|--|------------------------------------------------------------------------------------------------------------------------------------------------------------------------------------------------------------------------------------------------------------------------------------------------------------------------------------------------|--|--|----------------------------------------------------------------------------------------------------------------------------|
|  | s,<br>HR<br>mo<br>nito<br>r | obs<br>tetr<br>icia<br>n |  |  |  | at the<br>Hospit<br>al |  |  |  |  |  |  | down<br>period,<br>both of<br>10–12<br>min;<br>walking<br>and light,<br>static<br>stretching<br>of most<br>muscle<br>group.<br>Main part<br>of 25–30<br>min;<br>moderate-<br>intensity<br>resistance<br>exercises<br>at full<br>range of<br>major<br>muscle<br>groups<br>motion.<br>One set of<br>pelvic<br>tilting in<br>standing<br>position |  |  | y<br>supervis<br>ed by<br>qualifie<br>d fitness<br>specialis<br>t with<br>the<br>assistan<br>ce of an<br>obstetric<br>ian. |
|--|-----------------------------|--------------------------|--|--|--|------------------------|--|--|--|--|--|--|------------------------------------------------------------------------------------------------------------------------------------------------------------------------------------------------------------------------------------------------------------------------------------------------------------------------------------------------|--|--|----------------------------------------------------------------------------------------------------------------------------|

|  |  |  |  |  |  |  |  |  |  |  |  |  |                                                                                                                                                                                                                                     |  |  |  |
|--|--|--|--|--|--|--|--|--|--|--|--|--|-------------------------------------------------------------------------------------------------------------------------------------------------------------------------------------------------------------------------------------|--|--|--|
|  |  |  |  |  |  |  |  |  |  |  |  |  | and exercises using bar bells or low-to-medium resistance elastic bands (Therabands). In addition, one session/week of aerobic choreography dance in sections of 3–4 min with 1 min breaks of stretching and relaxation activities. |  |  |  |
|--|--|--|--|--|--|--|--|--|--|--|--|--|-------------------------------------------------------------------------------------------------------------------------------------------------------------------------------------------------------------------------------------|--|--|--|



|                   |                                                                      |    |            |            |                                    |    |                                      |    |    |    |                                                                                                                                                     |                                                      |                                                                                                                                                                                                                                                           |                                                                                                                                                                              |    |                                                                                                                     |
|-------------------|----------------------------------------------------------------------|----|------------|------------|------------------------------------|----|--------------------------------------|----|----|----|-----------------------------------------------------------------------------------------------------------------------------------------------------|------------------------------------------------------|-----------------------------------------------------------------------------------------------------------------------------------------------------------------------------------------------------------------------------------------------------------|------------------------------------------------------------------------------------------------------------------------------------------------------------------------------|----|---------------------------------------------------------------------------------------------------------------------|
| Ruiz, 2013, Spain | Bar - bells (3 kg), bench, elastic bands (the rab and s), HR monitor | ND | In a group | Supervised | HR monitors, and Borg conventional | ND | Light to moderate exercise intensity | ND | ND | ND | Intervention Group: threat of prematurity (n=14), persistent bleeding (n=7); Control group: threat of prematurity (n=11), persistent bleeding (n=9) | Hospital Universitario de Fuenlabrada, Madrid, Spain | Light to moderate-intensity aerobic and resistance exercise, 3 times a week, 50-55 min per session. Start and finish with 10-min warm-up and 10-min cool-down, respectively, with same exercises of light intensity walking and static stretching of most | HR consistently less than 60% of age predicted maximum HR (208 - [0.7 * age in years]), and rate of RPE n range from 10 to 12 (fairly light to somewhat hard, respectively). | ND | Total pleasure with the intervention, adherence > 97%, intention to be physically active during future pregnancies. |
|-------------------|----------------------------------------------------------------------|----|------------|------------|------------------------------------|----|--------------------------------------|----|----|----|-----------------------------------------------------------------------------------------------------------------------------------------------------|------------------------------------------------------|-----------------------------------------------------------------------------------------------------------------------------------------------------------------------------------------------------------------------------------------------------------|------------------------------------------------------------------------------------------------------------------------------------------------------------------------------|----|---------------------------------------------------------------------------------------------------------------------|

|  |  |  |  |  |  |  |  |  |  |  |  |  |                                                                                                                                                                                                                                             |  |  |  |
|--|--|--|--|--|--|--|--|--|--|--|--|--|---------------------------------------------------------------------------------------------------------------------------------------------------------------------------------------------------------------------------------------------|--|--|--|
|  |  |  |  |  |  |  |  |  |  |  |  |  | muscle groups, plus relaxation and pelvic floor exercises at cool-down period. Core section of 25 to 30 min of moderate intensity aerobic exercises once a week; low-impact aerobic dance activities for 3 to 4 min with 1-min breaks, with |  |  |  |
|--|--|--|--|--|--|--|--|--|--|--|--|--|---------------------------------------------------------------------------------------------------------------------------------------------------------------------------------------------------------------------------------------------|--|--|--|

|  |  |  |  |  |  |  |  |  |  |  |  |  |                                                                                                                                                                                                                                                                                                                                                             |  |  |  |
|--|--|--|--|--|--|--|--|--|--|--|--|--|-------------------------------------------------------------------------------------------------------------------------------------------------------------------------------------------------------------------------------------------------------------------------------------------------------------------------------------------------------------|--|--|--|
|  |  |  |  |  |  |  |  |  |  |  |  |  | stretching<br>and<br>relaxation<br>of upper<br>and lower<br>limbs.<br>Resistanc<br>e<br>exercises<br>twice a<br>week;<br>performa<br>nce<br>through<br>the full<br>range of<br>motion,<br>engaging<br>major<br>muscle<br>groups,<br>strengthe<br>ning the<br>muscles<br>used in<br>labor and<br>the pelvic<br>floor<br>(3 <sup>rd</sup> trimest<br>er), and |  |  |  |
|--|--|--|--|--|--|--|--|--|--|--|--|--|-------------------------------------------------------------------------------------------------------------------------------------------------------------------------------------------------------------------------------------------------------------------------------------------------------------------------------------------------------------|--|--|--|

|                   |                   |                  |    |    |                         |                                            |                                                                                             |    |    |                                                                 |                 |                                                                                  |                                                                                                                                          |         |                         |                                                                                                                                                    |
|-------------------|-------------------|------------------|----|----|-------------------------|--------------------------------------------|---------------------------------------------------------------------------------------------|----|----|-----------------------------------------------------------------|-----------------|----------------------------------------------------------------------------------|------------------------------------------------------------------------------------------------------------------------------------------|---------|-------------------------|----------------------------------------------------------------------------------------------------------------------------------------------------|
|                   |                   |                  |    |    |                         |                                            |                                                                                             |    |    |                                                                 |                 |                                                                                  | supine position on the floor exercises up to 2 min.                                                                                      |         |                         |                                                                                                                                                    |
| Nobles, 2015. USA | Digital pedometer | Health educators | ND | ND | Questionnaires, manuals | Booster telephone calls, mailed tip sheets | Safe progress toward the overall PA goal; weekly increment by 10% of spent time at moderate | ND | ND | Counseling of IOM guidelines for appropriate nutrition and GWG. | Medical records | ambulatory obstetric practices of Baystate Medical Center, western Massachusetts | ≥ 30 min of moderate-intensity PA on most days of the week. Specific self-selected activities including dancing, walking, and yard work. | Generic | Tailoring questionnaire | 62.1% of participants meeting the College's guidelines for PA, adherence as returning completed questionnaires, 95% of participants satisfied with |

|                            |                                                                                                                                                                                            |                            |                      |                        |                                                                                                                                                                     |                                                               |                                                                                                                                                                                                                 |    |    |    |                  |                                                                                                                                |                                                                                                                                                                                                                                                                                                             |                                                                       |                                                                                                                                                                                                                                                                                             |                                                                                                                                                                                       |
|----------------------------|--------------------------------------------------------------------------------------------------------------------------------------------------------------------------------------------|----------------------------|----------------------|------------------------|---------------------------------------------------------------------------------------------------------------------------------------------------------------------|---------------------------------------------------------------|-----------------------------------------------------------------------------------------------------------------------------------------------------------------------------------------------------------------|----|----|----|------------------|--------------------------------------------------------------------------------------------------------------------------------|-------------------------------------------------------------------------------------------------------------------------------------------------------------------------------------------------------------------------------------------------------------------------------------------------------------|-----------------------------------------------------------------------|---------------------------------------------------------------------------------------------------------------------------------------------------------------------------------------------------------------------------------------------------------------------------------------------|---------------------------------------------------------------------------------------------------------------------------------------------------------------------------------------|
|                            |                                                                                                                                                                                            |                            |                      |                        |                                                                                                                                                                     |                                                               | inten<br>sity<br>PA                                                                                                                                                                                             |    |    |    |                  |                                                                                                                                |                                                                                                                                                                                                                                                                                                             |                                                                       |                                                                                                                                                                                                                                                                                             | informat<br>ion<br>received                                                                                                                                                           |
| Bisson,<br>2015,<br>Canada | Stat<br>ion<br>ary<br>erg<br>ocy<br>cle,<br>trea<br>dm<br>ill,<br>exe<br>rcis<br>ing<br>ball<br>s,<br>stre<br>ngt<br>h<br>equ<br>ip<br>me<br>nt,<br>HR<br>mo<br>nito<br>rs,<br>acc<br>eler | Kin<br>esio<br>logi<br>sts | Indiv<br>idual<br>ly | Sup<br>er<br>vise<br>d | Self-<br>moni<br>torin<br>g<br>with<br>HR<br>moni<br>tors,<br>Borg<br>Scale<br>,<br>exerc<br>ise<br>log,<br>accel<br>erom<br>etry,<br>quest<br>ionn<br>aire,<br>MET | Couns<br>eling,<br>modifi<br>cation<br>of PA,<br>pamph<br>let | Targ<br>ets at<br>70%<br>of<br>peak<br>HR<br>(fitne<br>ss<br>test),<br>prog<br>ressi<br>vely<br>incre<br>asem<br>ent<br>PA<br>from<br>15<br>min<br>of 1st<br>week<br>to 30<br>min<br>by<br>the<br>end<br>of the | ND | ND | ND | None<br>reported | Heart<br>Disease<br>prevention<br>Pavilion<br>(University<br>Institute of<br>Cardiology<br>and<br>Pneumolog<br>y of<br>Quebec) | ACSM<br>guideline<br>s;<br>moderate-<br>intensity<br>exercise<br>sessions<br>of 1h, 3<br>times<br>weekly.<br>Warm-up<br>5–10 min<br>on a<br>stationary<br>ergocycle.<br>15–30 min<br>treadmill<br>walk. 20<br>min<br>muscular<br>work-out<br>with<br>dynamic<br>exercises<br>for both<br>lower and<br>upper | Intensity<br>adjusted<br>to<br>participan<br>ts' toleran<br>ce level. | Cardiores<br>piratory<br>testing in<br>obese<br>pregnant<br>women.<br>Assessme<br>nt for PA,<br>anthropo<br>metry,<br>fitness<br>and fetal<br>growth.<br>Start with<br>1 set of<br>10–15<br>repetition<br>s per<br>exercise<br>and<br>progresse<br>d to 2 sets<br>of 15<br>repetition<br>s. | Docume<br>ntation<br>of PA at<br>GW 36.<br>Particip<br>ants' per<br>centages<br>and accom<br>plished<br>level of<br>prescrib<br>ed<br>sessions:<br>60% ≥<br>50%,<br>and 20%<br>≥ 75%. |

|                                |                                          |                       |              |              |             |                                                            |                                               |                                 |                            |    |               |         |                                                                                                                                                |                                 |    |                             |
|--------------------------------|------------------------------------------|-----------------------|--------------|--------------|-------------|------------------------------------------------------------|-----------------------------------------------|---------------------------------|----------------------------|----|---------------|---------|------------------------------------------------------------------------------------------------------------------------------------------------|---------------------------------|----|-----------------------------|
|                                | ometer                                   |                       |              |              |             |                                                            | 1st month.                                    |                                 |                            |    |               |         | limbs using the participant's own body weight, small weights, exercising balls and strength equipment with selective charge. Cool-down period. |                                 |    |                             |
| Seneviratne, 2015, New Zealand | Magnetic stationary bicycles, HR monitor | Exercise physiologist | Individually | Unsupervised | HR monitors | An available exercise physiologist for help with exercise- | HR in exercise sessions at moderate intensity | Written program of prescription | Home-based cycling program | ND | None reported | At home | 5-min warm-up and cool-down period at low intensity. Frequency varying between three and five                                                  | According to stage of pregnancy | ND | Download of HR monitor data |

|                      |                                          |                     |            |            |             |                   |                                                            |                          |    |    |                                                                                                                                  |                                                      |                                                                                                                                    |         |    |                                                                       |
|----------------------|------------------------------------------|---------------------|------------|------------|-------------|-------------------|------------------------------------------------------------|--------------------------|----|----|----------------------------------------------------------------------------------------------------------------------------------|------------------------------------------------------|------------------------------------------------------------------------------------------------------------------------------------|---------|----|-----------------------------------------------------------------------|
|                      | nitors                                   |                     |            |            |             | related problems. |                                                            |                          |    |    |                                                                                                                                  |                                                      | sessions per week, and duration of moderate-intensity exercise between 15 and 30 min per session, according to stage of pregnancy. |         |    |                                                                       |
| Perales, 2016, Spain | HR monitors, lightweight, fit ball, dumb | Fitness instructors | In a group | Supervised | HR monitors | ND                | Narrow HR target at high end of moderate – intensity; 55%– | Visualization techniques | ND | ND | Intervention Group: risk of prematurity(n=4), obstetric complications (n=3); Control Group: risk of prematurity (n=5), obstetric | Hospital Universitario de Fuenlabrada, Madrid, Spain | Three aerobic and strength training sessions per week, of 55–60 min per session. Constant duration and structure.                  | Generic | ND | HR values every 2, 15 min after of sitting while taking deep breaths. |

|  |           |  |  |  |  |  |                  |  |  |  |                         |  |                                                                                                                                                                                                                                                                                                                                                      |  |  |  |
|--|-----------|--|--|--|--|--|------------------|--|--|--|-------------------------|--|------------------------------------------------------------------------------------------------------------------------------------------------------------------------------------------------------------------------------------------------------------------------------------------------------------------------------------------------------|--|--|--|
|  | bell<br>s |  |  |  |  |  | 60%<br>of<br>HRR |  |  |  | complicat<br>ions (n=4) |  | Start with<br>a 5- to 7-<br>min<br>warm-up<br>consisting<br>of<br>walking<br>at<br>different<br>intensities<br>, mild<br>static<br>stretching<br>of most<br>muscle<br>groups,<br>joint<br>mobility<br>exercises,<br>and<br>locomotio<br>n games.<br>Aerobic<br>activities<br>for 25–30<br>min of<br>different<br>exercises<br>and music<br>choreogra |  |  |  |
|--|-----------|--|--|--|--|--|------------------|--|--|--|-------------------------|--|------------------------------------------------------------------------------------------------------------------------------------------------------------------------------------------------------------------------------------------------------------------------------------------------------------------------------------------------------|--|--|--|



|  |  |  |  |  |  |  |  |  |  |  |  |  |                                                                                                                                                                                                                                                                                                                                         |  |  |  |
|--|--|--|--|--|--|--|--|--|--|--|--|--|-----------------------------------------------------------------------------------------------------------------------------------------------------------------------------------------------------------------------------------------------------------------------------------------------------------------------------------------|--|--|--|
|  |  |  |  |  |  |  |  |  |  |  |  |  | phies.<br>Next, the<br>strength<br>part of the<br>session,<br>engaging<br>major<br>muscles<br>groups<br>with the<br>aim of<br>improvin<br>g general<br>muscle<br>strength<br>and<br>preventin<br>g<br>common<br>muscle<br>imbalanc<br>s during<br>pregnanc<br>y (low<br>back pain,<br>sciatica,<br>and<br>kyphosis),<br>and<br>improvin |  |  |  |
|--|--|--|--|--|--|--|--|--|--|--|--|--|-----------------------------------------------------------------------------------------------------------------------------------------------------------------------------------------------------------------------------------------------------------------------------------------------------------------------------------------|--|--|--|

|  |  |  |  |  |  |  |  |  |  |  |  |  |                                                                                                                                                                                                                                                                                                                                           |  |  |  |
|--|--|--|--|--|--|--|--|--|--|--|--|--|-------------------------------------------------------------------------------------------------------------------------------------------------------------------------------------------------------------------------------------------------------------------------------------------------------------------------------------------|--|--|--|
|  |  |  |  |  |  |  |  |  |  |  |  |  | g balance,<br>pelvis<br>mobility,<br>and body<br>awarenes<br>s, as well<br>as pelvic<br>floor<br>muscle<br>exercises<br>for<br>preventio<br>n of<br>urinary<br>incontine<br>nce. End<br>with a 5-<br>to 10-min<br>cool-<br>down<br>period<br>including<br>relaxing<br>exercises,<br>static<br>stretching<br>, and<br>partner<br>massages. |  |  |  |
|--|--|--|--|--|--|--|--|--|--|--|--|--|-------------------------------------------------------------------------------------------------------------------------------------------------------------------------------------------------------------------------------------------------------------------------------------------------------------------------------------------|--|--|--|

|                                     |                              |                       |            |            |                              |                                                   |                                                                                       |    |                                                                                                                                     |    |                                                                               |                    |                                                                                                      |                                            |    |                                                                                            |
|-------------------------------------|------------------------------|-----------------------|------------|------------|------------------------------|---------------------------------------------------|---------------------------------------------------------------------------------------|----|-------------------------------------------------------------------------------------------------------------------------------------|----|-------------------------------------------------------------------------------|--------------------|------------------------------------------------------------------------------------------------------|--------------------------------------------|----|--------------------------------------------------------------------------------------------|
| Krohn<br>Garnæs,<br>2016,<br>Norway | Treadmill                    | Physiotherapist       | Individual | Supervised | Training diary, Borg Scale   | Motivational interview session, and encouragement | Endurance exercise at 80% of the maximum capacity, according to the Borg Scale 12-15. | ND | 50 min at least one weekly (35 min of endurance training and 15 min of strength exercises), and daily pelvic floor muscle exercises | ND | None reported                                                                 | St. Olvas Hospital | Three times a week, 35 min of moderate-intensity endurance exercise and 25 min of strength training. | Adjustment to each woman's strength level. | ND | Late pregnancy: physically active $\geq$ 30 min/day 61%, and regular exercise training 77% |
| Guelfi,<br>2016,<br>Australia       | Upright cycle ergometer, acc | Exercise physiologist | Individual | Supervised | Accelerometer, questionnaire | ND                                                | Progressively increased session's duration by 5-                                      | ND | Home-based stationary cycling program                                                                                               | ND | Intervention Group: pregnancy loss (n=1); Control Group: pregnancy loss (n=2) | At home            | Sessions three times each week. Start with a 5-min warm up consisting of                             | Tailored to the individual                 | ND | Supervised sessions by an exercise physiologist monitoring the duration                    |

|  |                    |  |  |  |  |  |                                                                                                                                                                                                                                           |  |  |  |  |                                                                                                                                                                                                                                                                                                                                                                  |  |  |                                     |
|--|--------------------|--|--|--|--|--|-------------------------------------------------------------------------------------------------------------------------------------------------------------------------------------------------------------------------------------------|--|--|--|--|------------------------------------------------------------------------------------------------------------------------------------------------------------------------------------------------------------------------------------------------------------------------------------------------------------------------------------------------------------------|--|--|-------------------------------------|
|  | eler<br>om<br>eter |  |  |  |  |  | min<br>ever<br>y 2–3<br>week<br>s,<br>from<br>20 to<br>30<br>min<br>to a<br>max<br>of 60<br>min.<br>Degr<br>ee of<br>prog<br>ressi<br>on<br>accor<br>ding<br>to the<br>basel<br>ine<br>fitnes<br>s<br>level<br>and<br>ongo<br>ing<br>preg |  |  |  |  | pedaling<br>at an<br>intensity<br>equated<br>to 55–65%<br>of age-<br>predicted<br>maximum<br>HR and a<br>rating of<br>9–11 on<br>the Borg<br>Scale.<br>Subseque<br>nt period<br>divided<br>into 5-min<br>periods of<br>continuou<br>s<br>moderate-<br>intensity<br>cycling,<br>alternatin<br>g with 5-<br>min<br>periods of<br>interval<br>cycling;<br>two types |  |  | and<br>intensity<br>of<br>exercise. |
|--|--------------------|--|--|--|--|--|-------------------------------------------------------------------------------------------------------------------------------------------------------------------------------------------------------------------------------------------|--|--|--|--|------------------------------------------------------------------------------------------------------------------------------------------------------------------------------------------------------------------------------------------------------------------------------------------------------------------------------------------------------------------|--|--|-------------------------------------|

|                         |                                |                         |    |                        |                                                           |    |                                                        |    |    |    |                                                                                 |                                           |                                                                                                                                                                                                                                                            |                                      |                                                                              |                                                                   |
|-------------------------|--------------------------------|-------------------------|----|------------------------|-----------------------------------------------------------|----|--------------------------------------------------------|----|----|----|---------------------------------------------------------------------------------|-------------------------------------------|------------------------------------------------------------------------------------------------------------------------------------------------------------------------------------------------------------------------------------------------------------|--------------------------------------|------------------------------------------------------------------------------|-------------------------------------------------------------------|
|                         |                                |                         |    |                        |                                                           |    | nancy<br>symp<br>toms.                                 |    |    |    |                                                                                 |                                           | of<br>intervals:<br>an<br>increase<br>in<br>pedaling<br>rate for 15<br>seconds<br>(sec), and<br>an<br>increase<br>in cycling<br>resistance<br>for 30 sec<br>repeated<br>every 2<br>min. End<br>with 5-<br>min cool-<br>down by<br>light<br>stretching<br>. |                                      |                                                                              |                                                                   |
| Wang,<br>2017,<br>China | Stat<br>ion<br>ary<br>bik<br>e | Res<br>ear<br>che<br>rs | ND | Sup<br>er<br>vise<br>d | Ques<br>tion<br>naires,<br>Borg<br>Scale<br>asses<br>sing | ND | Prog<br>ressi<br>ve<br>incre<br>ase<br>of the<br>exerc | ND | ND | ND | Standard<br>prenatal<br>care for all<br>women.<br>Recording<br>and<br>review of | Peking<br>University<br>First<br>Hospital | Exercise<br>at the<br>beginning<br>of the<br>interventi<br>on at the<br>lower                                                                                                                                                                              | Tailored<br>to the<br>individua<br>l | Measure<br>ments of<br>each<br>participan<br>t's height<br>to the<br>nearest | Questio<br>nnaire,<br>metaboli<br>c<br>equivale<br>nts of<br>task |

|                     |         |          |            |            |                                               |                 |                                                                                                                             |    |    |                |                                                                                           |                          |                                                                                                                                                |                  |                                                                                                    |                     |
|---------------------|---------|----------|------------|------------|-----------------------------------------------|-----------------|-----------------------------------------------------------------------------------------------------------------------------|----|----|----------------|-------------------------------------------------------------------------------------------|--------------------------|------------------------------------------------------------------------------------------------------------------------------------------------|------------------|----------------------------------------------------------------------------------------------------|---------------------|
|                     |         |          |            |            | the RPE score, records based on the RPE score |                 | ise duration to 45-60 min, adding 5 min to the intervals or the continuous phases of cycling, based on individual abilities |    |    |                | cervical length at each examination and exclusion of women with a cervical length <25 mm. |                          | calculated limit, based on the maximum predicted HR for age, progressively increased with the progress of the program, at least 3 days a week. |                  | 0.5 cm without shoes, weight accurate to 0.1 kg with light clothing, and BMI calculation as kg/m². | min/week            |
| Daly, 2017, Ireland | Weights | Research | In a group | Supervised | HR monitoring                                 | Secret Facebook | According to the                                                                                                            | ND | ND | Facebook group | None reported                                                                             | Coombe Women and Infants | 50–60 min of exercise sessions;                                                                                                                | Exercises scaled | ParMed-X for pregnancy                                                                             | Attendance recorded |

|  |  |       |  |  |                     |                                                                                                                                                                                                                                                            |          |  |  |                                                                                                                                           |  |                                               |                                                                                                                                                                                                                                                                                                                                    |                                                               |                                                                                   |                                                         |
|--|--|-------|--|--|---------------------|------------------------------------------------------------------------------------------------------------------------------------------------------------------------------------------------------------------------------------------------------------|----------|--|--|-------------------------------------------------------------------------------------------------------------------------------------------|--|-----------------------------------------------|------------------------------------------------------------------------------------------------------------------------------------------------------------------------------------------------------------------------------------------------------------------------------------------------------------------------------------|---------------------------------------------------------------|-----------------------------------------------------------------------------------|---------------------------------------------------------|
|  |  | chers |  |  | g,<br>Borg<br>Scale | group<br>goal-<br>setting<br>, class<br>in a<br>group,<br>journal<br>ing,<br>taught<br>weekl<br>y, on a<br>choice<br>of<br>days,<br>and h,<br>varied<br>each<br>day,<br>and a<br>“kids’<br>corner<br>” with<br>toys<br>and a<br>mat<br>and<br>plaype<br>n. | ACO<br>G |  |  | lifestyle<br>advice,<br>pamphlet<br>with<br>information<br>on healthy<br>eating during<br>pregnancy<br>based on<br>national<br>guidelines |  | University<br>Hospital,<br>Dublin,<br>Ireland | 10-min<br>warm-up<br>focused<br>on core<br>and pelvic<br>floor<br>exercises;<br>15–20 min<br>of<br>resistance<br>or<br>weights<br>working<br>important<br>muscle<br>groups for<br>a healthy<br>pregnanc<br>y and<br>birth<br>recovery<br>(lower<br>limb,<br>upper<br>limb,<br>back, and<br>core<br>muscle<br>groups);<br>15–20 min | according<br>to the<br>ability,<br>SMART<br>personal<br>goals | y form to<br>rule out<br>contraindi<br>cations to<br>exercise in<br>pregnanc<br>y | d by<br>both<br>particip<br>ants and<br>research<br>ers |
|--|--|-------|--|--|---------------------|------------------------------------------------------------------------------------------------------------------------------------------------------------------------------------------------------------------------------------------------------------|----------|--|--|-------------------------------------------------------------------------------------------------------------------------------------------|--|-----------------------------------------------|------------------------------------------------------------------------------------------------------------------------------------------------------------------------------------------------------------------------------------------------------------------------------------------------------------------------------------|---------------------------------------------------------------|-----------------------------------------------------------------------------------|---------------------------------------------------------|

|  |  |  |  |  |  |  |  |  |  |  |  |  |                                                           |  |  |  |
|--|--|--|--|--|--|--|--|--|--|--|--|--|-----------------------------------------------------------|--|--|--|
|  |  |  |  |  |  |  |  |  |  |  |  |  | of aerobic<br>exercises;<br>and 10-<br>min cool-<br>down. |  |  |  |
|--|--|--|--|--|--|--|--|--|--|--|--|--|-----------------------------------------------------------|--|--|--|

ND, no data; GWG, gestational weight gain; ACOG, American College of Obstetricians and Gynecologists; PA, physical activity; MET, metabolic equivalent of task; ACSM; American College of Sports Medicine; Min, minute; 1RM; incomplete rest method; kg, kilogram; HR, heart ration; RPE; rate of perceived exertion; IOM, institute of medicine; h, hour; GW, gestational week; HRR, heart rate recovery; St, Saint; BMI, body mass index; SMART, specific measurable achievable relevant and time-bound



**Table S3. Diagnostic modalities of GDM in eligible trials with dietary intervention**

| <b>First author, publication year</b> | <b>Diagnostic test for GDM</b>                                                     | <b>Gestational weeks of diagnostic test performance</b> |
|---------------------------------------|------------------------------------------------------------------------------------|---------------------------------------------------------|
| Korpi-Hyövähti, 2011                  | 2-h 75-gr OGTT                                                                     | 8-12                                                    |
| Quinlivan, 2011                       | 2-h 75-gr OGTT                                                                     | 24-28                                                   |
| Walsh, 2012                           | 1-h 50-gr OGTT; FBG 100-gr OGTT, 1-h 100-gr OGTT, 2-h 100-gr OGTT, 3-h 100-gr OGTT | 28                                                      |
| McCarthy, 2016                        | 1-h 50-gr OGTT; FBG 75-gr OGTT, 1-h 75-gr OGTT, 2-h 75-gr OGTT                     | 26-28                                                   |
| Yi Zhang, 2019                        | 2-h 75-gr OGTT                                                                     | 24-28                                                   |
| Al Wattar, 2019                       | FBG 75-gr OGTT, 2-h 75-gr OGTT                                                     | 24-28                                                   |
| Okesene-Gafa, 2019                    | FBG 75-g OGTT, 1-h 75-gr OGTT, 2-h 75-gr OGTT                                      | 26-28                                                   |
| Melero, 2020                          | FBG 75-gr OGTT, 1-h 75-gr OGTT, 2-h 75-gr OGTT                                     | 24-28                                                   |
| Basu, 2021                            | 1-h 50-gr OGTT; FBG 100-gr OGTT, 1-h 100-gr OGTT, 2-h 100-gr OGTT, 3-h 100-gr OGTT | 24-28                                                   |
| Dong-Yao Zhang, 2022                  | FBG 75-gr OGTT, 1-h 75-gr OGTT, 2-h 75-gr OGTT                                     | 25-28                                                   |

GDM, gestational diabetes mellitus; h, hour; gr, grams; OGTT, oral glucose tolerance test; FBG, fasting blood glucose

**Table S4. Diagnostic modalities of GDM in eligible trials with exercise intervention**

| First author, publication year | Diagnostic test for GDM                                                            | Gestational weeks of diagnostic test performance |
|--------------------------------|------------------------------------------------------------------------------------|--------------------------------------------------|
| Do Nascimento, 2011            | ND                                                                                 | ND                                               |
| Oostdam, 2012                  | FBG; HbA1c                                                                         | 24, 32                                           |
| Price, 2012                    | FBG 100-gr OGTT, 1-h 100-gr OGTT, 2-h 100-gr OGTT, 3-h 100-gr OGTT                 | ND                                               |
| Barakat, 2013                  | FBG 75-gr OGTT, 1-h 75-gr OGTT, 2-h 75-gr OGTT                                     | 24-26                                            |
| Ruiz, 2013                     | ND                                                                                 | ND                                               |
| Nobles, 2015                   | 1-h 50-gr OGTT; FBG 100-gr OGTT, 1-h 100-gr OGTT, 2-h 100-gr OGTT, 3-h 100-gr OGTT | 24-28                                            |
| Bisson, 2015                   | ND                                                                                 | 28                                               |
| Seneviratne, 2015              | FBG 75-gr OGTT, 2-h 75-gr OGTT                                                     | ND                                               |
| Perales, 2016                  | 1-h 50-gr OGTT; FBG 100-gr OGTT, 1-h 100-gr OGTT, 2-h 100-gr OGTT, 3-h 100-gr OGTT | 24-28                                            |
| Krohn Garnæs, 2016             | FBG 75-gr OGTT, 2-h 75-gr OGTT                                                     | 24-28                                            |
| Guelfi, 2016                   | FBG 75-gr OGTT, 2-h 75-gr OGTT                                                     | 26-28                                            |
| Wang, 2017                     | FBG 75-gr OGTT, 1-h 75-gr OGTT, 2-h 75-gr OGTT                                     | 24-28                                            |
| Daly, 2017                     | FBG 75-gr OGTT, 1-h 75-gr OGTT, 2-h 75-gr OGTT                                     | 24-28                                            |

GDM, gestational diabetes mellitus; ND, no data; FBG, fasting blood glucose; HbA1c, hemoglobin A1c; h, hour; gr, grams; OGTT, oral glucose tolerance test

**Table S5. Diagnostic modalities of GDM in eligible trials with dietary plus exercise intervention**

| <b>First author, publication year</b> | <b>Diagnostic test for GDM</b>                                                     | <b>Gestational weeks of diagnostic test performance</b> |
|---------------------------------------|------------------------------------------------------------------------------------|---------------------------------------------------------|
| Luoto, 2011                           | FBG 75-gr OGTT, 1-h 75-gr OGTT, 2-h 75-gr OGTT                                     | 26-28                                                   |
| Vinter, 2011                          | 2-h 75-gr OGTT                                                                     | 12-14, 28-30, 34-36                                     |
| Harrison, 2013                        | FBG 75-gr OGTT, 1-h 75-gr OGTT, 2-h 75-gr OGTT                                     | 12-15, 26-28                                            |
| Petrella, 2013                        | FBG 75-gr OGTT, 1-h 75-gr OGTT, 2-h 75-gr OGTT                                     | 16-18, 24-28                                            |
| Dodd, 2014                            | FBG 75-gr OGTT, 2-h 75-gr OGTT                                                     | 12-14, 24-28                                            |
| Hui, 2014                             | FBG 75-gr OGTT, 1-h 75-gr OGTT, 2-h 75-gr OGTT                                     | 24-28                                                   |
| Poston, 2015                          | FBG 75-gr OGTT, 1-h 75-gr OGTT, 2-h 75-gr OGTT                                     | 27 <sup>+6d</sup> , 28 <sup>+6d</sup>                   |
| Koivusalo, 2015                       | FBG 75-gr OGTT, 1-h 75-gr OGTT, 2-h 75-gr OGTT                                     | 24-28                                                   |
| Bruno, 2016                           | FBG 75-gr OGTT, 1-h 75-gr OGTT, 2-h 75-gr OGTT                                     | 16-18, 24-28                                            |
| Kennelly, 2018                        | FBG 75-gr OGTT, 1-h 75-gr OGTT, 2-h 75-gr OGTT                                     | 28                                                      |
| Chan, 2018                            | FBG 75-gr OGTT, 1-h 75-gr OGTT, 2-h 75-gr OGTT                                     | 24-28                                                   |
| Ferrara, 2020                         | 1-h 50-gr OGTT; FBG 100-gr OGTT, 1-h 100-gr OGTT, 2-h 100-gr OGTT, 3-h 100-gr OGTT | 8-15, 29-38                                             |
| Lin, 2020                             | FBG 75-gr OGTT, 1-h 75-gr OGTT, 2-h 75-gr OGTT                                     | 24-28                                                   |
| Li, 2021                              | 1-h 50-gr OGTT; FBG 100-gr OGTT, 1-h 100-gr OGTT, 2-h 100-gr OGTT, 3-h 100-gr OGTT | 24-28                                                   |
| Liu, 2021                             | FBG 75-gr OGTT, 1-h 75-gr OGTT, 2-h 75-gr OGTT                                     | 24-28                                                   |
| Ding, 2021                            | FBG 75-gr OGTT, 1-h 75-gr OGTT, 2-h 75-gr OGTT                                     | 24-28                                                   |
| Deng, 2022                            | FBG 75-gr OGTT, 1-h 75-gr OGTT, 2-h 75-gr OGTT                                     | 24-28                                                   |
| Sadiya, 2022                          | FBG 75-gr OGTT, 1-h 75-gr OGTT, 2-h 75-gr OGTT                                     | 24-28                                                   |

GDM, gestational diabetes mellitus; FBG, fasting blood glucose; gr, grams; OGTT, oral glucose tolerance test; h, hour; d, days

**Table S6. Subgroup and sensitivity analyses for dietary intervention**

| Factor                         | Subgroup                             | Number of studies | Odds Ratio (95% CI) | P-value | Cochran's Q statistic | I <sup>2</sup> (95%CI) | Test of difference P-value |
|--------------------------------|--------------------------------------|-------------------|---------------------|---------|-----------------------|------------------------|----------------------------|
| <b>Subgroup analyses</b>       |                                      |                   |                     |         |                       |                        |                            |
| Similar Countries              | Oceania                              | 3                 | 0.75 (0.29, 2.00)   | 0.57    | 10.54                 | 81% (48, 93%)          | 0.76                       |
|                                | Great Britain                        | 2                 | 0.65 (0.49, 0.87)   | 0.003   | 0.04                  | 0% (n/a)               |                            |
|                                | China                                | 2                 | 0.63 (0.18, 2.20)   | 0.46    | 3.87                  | 74% (n/a)              |                            |
|                                | Finland                              | 1                 | 3.25 (0.32, 33.41)  | 0.32    | n/a                   | n/a                    |                            |
|                                | Spain                                | 1                 | 0.50 (0.27, 0.94)   | 0.03    | n/a                   | n/a                    |                            |
|                                | USA                                  | 1                 | 0.51 (0.10, 2.61)   | 0.42    | n/a                   | n/a                    |                            |
| Low education level            | More than 10% of participating women | 2                 | 0.86 (0.56, 1.33)   | 0.50    | 5.95                  | 83% (54, 94%)          | 0.52                       |
|                                | Up to 10% of participating women     | 1                 | 0.94 (0.67, 1.32)   | 0.78    | n/a                   | n/a                    |                            |
| Increased BMI as a risk factor | Included                             | 8                 | 0.78 (0.64, 0.96)   | 0.02    | 19.38                 | 64% (0, 95%)           | 0.24                       |
|                                | Not included                         | 2                 | 0.57 (0.36, 0.93)   | 0.02    | 0.43                  | 0% (n/a)               |                            |
| Intervention duration          | More than 20 weeks                   | 3                 | 0.91 (0.59, 1.39)   | 0.66    | 7.14                  | 72% (20, 90%)          | 0.17                       |
|                                | Up to 20 weeks                       | 2                 | 0.54 (0.29, 1.01)   | 0.05    | 1.48                  | 33% (n/a)              |                            |
| Mediterranean diet             | Included                             | 2                 | 0.61 (0.46, 0.81)   | 0.0005  | 0.48                  | 0% (n/a)               | 0.06                       |
|                                | Not included                         | 8                 | 0.88 (0.68, 1.15)   | 0.35    | 16.71                 | 58% (48, 65%)          |                            |

|                                            |                   |   |                   |        |       |               |      |
|--------------------------------------------|-------------------|---|-------------------|--------|-------|---------------|------|
| Motivation component in the intervention   | Included          | 9 | 0.71 (0.58, 0.87) | 0.0008 | 19.40 | 59% (17, 79%) | 0.16 |
|                                            | Not included      | 1 | 1.08 (0.62, 1.87) | 0.78   | n/a   | n/a           |      |
| Sensitivity analyses                       |                   |   |                   |        |       |               |      |
| Effect of RCT with the largest sample size | Lower sample size | 9 | 0.73 (0.48, 1.13) | 0.16   | 19.67 | 59% (19, 79%) | n/a  |

USA, United States of America; CI, confidence interval; n/a, not applicable

**Table S7. Meta-regression for GDM OR in dietary intervention**

| <b>Covariate</b>        | <b>Number of studies</b> | <b>Coefficient b (95% CI)</b> | <b>SE</b> | <b>P-value</b> | <b>t</b> |
|-------------------------|--------------------------|-------------------------------|-----------|----------------|----------|
| Baseline risk of GDM    | 10                       | -0.5189 (-5.69526, 4.65746)   | 2.641     | 0.085          | -1.965   |
| Study duration (months) | 8                        | 0.019 (-0.00844, 0.04644)     | 0.014     | 0.228          | 1.342    |

GDM, gestational diabetes mellitus; OR, odds ratio; CI, confidence interval; SE, standard error

**Table S8. Subgroup and sensitivity analyses for exercise intervention**

| Factor                         | Subgroup                             | Number of studies | Odds Ratio (95% CI) | P-value   | Cochran's Q statistic | I <sup>2</sup> (95%CI) | Test of difference P-value |
|--------------------------------|--------------------------------------|-------------------|---------------------|-----------|-----------------------|------------------------|----------------------------|
| <b>Subgroup analyses</b>       |                                      |                   |                     |           |                       |                        |                            |
| Similar Countries              | North America                        | 3                 | 0.61 (0.33, 1.16)   | 0.13      | 0.07                  | 0% (0, 6%)             | 0.17                       |
|                                | Spain                                | 3                 | 0.59 (0.42, 0.84)   | 0.003     | 0.29                  | 0% (0, 6%)             |                            |
|                                | Oceania                              | 2                 | 1.10 (0.62, 1.97)   | 0.74      | 0.59                  | 0% (n/a)               |                            |
|                                | Brazil                               | 1                 | 0.45 (0.17, 1.22)   | 0.12      | n/a                   | n/a                    |                            |
|                                | Netherlands                          | 1                 | 0.62 (0.22, 1.76)   | 0.37      | n/a                   | n/a                    |                            |
|                                | Norway                               | 1                 | 0.53 (0.16, 1.81)   | 0.31      | n/a                   | n/a                    |                            |
|                                | Ireland                              | 1                 | 1.46 (0.62, 3.41)   | 0.39      | n/a                   | n/a                    |                            |
|                                | China                                | 1                 | 0.41 (0.24, 0.71)   | 0.001     | n/a                   | n/a                    |                            |
| Low education level            | More than 10% of participating women | 8                 | 0.54 (0.42, 0.69)   | < 0.00001 | 1.82                  | 0% (0, 83%)            | 0.98                       |
|                                | Up to 10% of participating women     | 1                 | 0.53 (0.16, 1.81)   | 0.31      | n/a                   | n/a                    |                            |
| Increased BMI as a risk factor | Included                             | 8                 | 0.60 (0.44, 0.82)   | 0.001     | 8.39                  | 17% (0, 72%)           | 0.59                       |
|                                | Not included                         | 5                 | 0.68 (0.50, 0.91)   | 0.01      | 2.56                  | 0% (0, 69%)            |                            |
| Intervention duration          | More than 20 weeks                   | 8                 | 0.60 (0.48, 0.75)   | < 0.0001  | 6.41                  | 0% (0, 64%)            | 0.28                       |
|                                | Up to 20 weeks                       | 5                 | 0.77 (0.52, 1.15)   | 0.20      | 3.73                  | 0% (0, 78%)            |                            |
| Motivation component           | Included                             | 8                 | 0.69 (0.51, 0.92)   | 0.01      | 5.81                  | 0% (0, 60%)            | 0.50                       |

|                                            |                   |    |                      |        |       |              |     |
|--------------------------------------------|-------------------|----|----------------------|--------|-------|--------------|-----|
| in the intervention                        | Not included      | 5  | 0.59<br>(0.43, 0.81) | 0.001  | 5.05  | 21% (0, 84%) |     |
| <b>Sensitivity analyses</b>                |                   |    |                      |        |       |              |     |
| Effect of RCT with the largest sample size | Lower sample size | 12 | 0.66<br>(0.52, 0.83) | 0.0005 | 10.75 | 0% (0, 70%)  | n/a |
| Attrition bias                             | Low               | 11 | 0.64<br>(0.50, 0.82) | 0.0004 | 11.23 | 11% (0, 64%) | n/a |

CI, confidence interval; n/a, not applicable



**Table S9. Meta-regression for GDM OR in exercise intervention**

| Covariate               | Number of studies | Coefficient b (95% CI)      | SE    | P-value | t      |
|-------------------------|-------------------|-----------------------------|-------|---------|--------|
| Baseline risk of GDM    | 13                | -0.108 (-2.0484, 1.8324)    | 0.999 | 0.916   | -0.108 |
| Study duration (months) | 13                | 0.001 (-0.001156, 0.003156) | 0.011 | 0.949   | 0.066  |

GDM, gestational diabetes mellitus; OR, odds ratio; CI, confidence interval; SE, standard error

**Table S10. Subgroup and sensitivity analyses for diet plus exercise intervention**

| Factor                         | Subgroup                             | Number of studies | Odds Ratio (95% CI) | P-value | Cochran's Q statistic | I <sup>2</sup> (95%CI) | Test of difference P-value |
|--------------------------------|--------------------------------------|-------------------|---------------------|---------|-----------------------|------------------------|----------------------------|
| Subgroup analyses              |                                      |                   |                     |         |                       |                        |                            |
| Similar Countries              | China                                | 6                 | 0.55 (0.33, 0.90)   | 0.02    | 15.89                 | 69% (30, 86%)          | 0.02                       |
|                                | Finland                              | 2                 | 0.90 (0.41, 2.00)   | 0.79    | 3.80                  | 74% (n/a)              |                            |
|                                | Great Britain                        | 2                 | 0.98 (0.78, 1.23)   | 0.87    | 0.31                  | 0% (n/a)               |                            |
|                                | Italy                                | 2                 | 0.32 (0.16, 0.60)   | 0.0005  | 0.91                  | 0% (n/a)               |                            |
|                                | North America                        | 2                 | 0.90 (0.45, 1.80)   | 0.77    | 0.77                  | 0% (n/a)               |                            |
|                                | Oceania                              | 2                 | 0.92 (0.45, 1.88)   | 0.82    | 4.83                  | 79% (0, 84%)           |                            |
|                                | Denmark                              | 1                 | 1.16 (0.44, 3.10)   | 0.76    | n/a                   | n/a                    |                            |
|                                | UAE                                  | 1                 | 0.37 (0.13, 1.03)   | 0.06    | n/a                   | n/a                    |                            |
| Low education level            | More than 10% of participating women | 7                 | 0.73 (0.55, 0.95)   | 0.02    | 15.80                 | 62% (20, 82%)          | 0.34                       |
|                                | Up to 10% of participating women     | 3                 | 0.90 (0.64, 1.26)   | 0.54    | 2.53                  | 21% (0, 97%)           |                            |
| Increased BMI as a risk factor | Included                             | 17                | 0.89 (0.79, 1.01)   | 0.06    | 41.45                 | 61% (36, 81%)          | 0.003                      |
|                                | Not included                         | 1                 | 0.17 (0.06, 0.51)   | 0.001   | n/a                   | n/a                    |                            |
| Intervention duration          | More than 20 weeks                   | 6                 | 1.09 (0.90, 1.32)   | 0.84    | 11.86                 | 58% (2, 82%)           | 0.03                       |
|                                | Up to 20 weeks                       | 8                 | 0.81 (0.67, 0.97)   | 0.02    | 17.85                 | 61% (51, 69%)          |                            |
| Sensitivity analyses           |                                      |                   |                     |         |                       |                        |                            |

|                                            |                   |    |                      |       |       |               |     |
|--------------------------------------------|-------------------|----|----------------------|-------|-------|---------------|-----|
| Effect of RCT with the largest sample size | Lower sample size | 17 | 0.67<br>(0.52, 0.86) | 0.002 | 40.16 | 60% (34, 76%) | n/a |
| Attrition bias                             | Low               | 17 | 0.73<br>(0.57, 0.93) | 0.01  | 46.33 | 65% (42, 79%) | n/a |

UAE, United Arab Emirates; CI, confidence interval; n/a, not applicable

**Table S11. Meta-regression for GDM OR in diet plus exercise intervention**

| <b>Covariate</b>        | <b>Number of studies</b> | <b>Coefficient b (95% CI)</b> | <b>SE</b> | <b>P-value</b> | <b>t</b> |
|-------------------------|--------------------------|-------------------------------|-----------|----------------|----------|
| Baseline risk of GDM    | 18                       | -1.754 (-3.41412, -0.09388)   | 0.847     | 0.055          | -2.071   |
| Study duration (months) | 17                       | 0.016 (0.00032, 0.03168)      | 0.008     | 0.065          | 1.991    |

GDM, gestational diabetes mellitus; OR, odds ratio; CI, confidence interval; SE, standard error

Table S12. GRADE evaluation of overall evidence for dietary intervention

| Diet for GDM prevention                                      |                                          |                              |                           |                              |                                 |          |
|--------------------------------------------------------------|------------------------------------------|------------------------------|---------------------------|------------------------------|---------------------------------|----------|
| Patient or population: pregnant women with high risk for GDM |                                          |                              |                           |                              |                                 |          |
| Settings: outpatient                                         |                                          |                              |                           |                              |                                 |          |
| Intervention: Diet                                           |                                          |                              |                           |                              |                                 |          |
| Outcomes                                                     | Illustrative comparative risks* (95% CI) |                              | Relative effect (95% CI)  | No of Participants (studies) | Quality of the evidence (GRADE) | Comments |
|                                                              | Assumed risk<br>Control                  | Corresponding risk<br>GDM    |                           |                              |                                 |          |
| GDM                                                          | Study population                         |                              | OR 0.73<br>(0.51 to 1.03) | 3109<br>(10 studies)         | ⊕⊕⊕⊖<br>moderate <sup>1</sup>   |          |
|                                                              | 198 per 1000                             | 152 per 1000<br>(112 to 202) |                           |                              |                                 |          |
|                                                              | Moderate                                 |                              |                           |                              |                                 |          |
|                                                              | 245 per 1000                             | 192 per 1000<br>(142 to 251) |                           |                              |                                 |          |

\*The basis for the **assumed risk** (e.g. the median control group risk across studies) is provided in footnotes. The **corresponding risk** (and its 95% confidence interval) is based on the assumed risk in the comparison group and the **relative effect** of the intervention (and its 95% CI).

CI: Confidence interval; OR: Odds ratio;

GRADE Working Group grades of evidence

**High quality:** Further research is very unlikely to change our confidence in the estimate of effect.

**Moderate quality:** Further research is likely to have an important impact on our confidence in the estimate of effect and may change the estimate.

**Low quality:** Further research is very likely to have an important impact on our confidence in the estimate of effect and is likely to change the estimate.

**Very low quality:** We are very uncertain about the estimate.

<sup>1</sup> Significant level of heterogeneity

Table S13. GRADE evaluation of overall evidence for exercise intervention

| Exercise for GDM prevention                                  |                                          |                              |                          |                              |                                 |          |
|--------------------------------------------------------------|------------------------------------------|------------------------------|--------------------------|------------------------------|---------------------------------|----------|
| Patient or population: pregnant women with high risk for GDM |                                          |                              |                          |                              |                                 |          |
| Settings: outpatient                                         |                                          |                              |                          |                              |                                 |          |
| Intervention: Exercise                                       |                                          |                              |                          |                              |                                 |          |
| Outcomes                                                     | Illustrative comparative risks* (95% CI) |                              | Relative effect (95% CI) | No of Participants (studies) | Quality of the evidence (GRADE) | Comments |
|                                                              | Assumed risk<br>Control                  | Corresponding risk<br>GDM    |                          |                              |                                 |          |
| GDM                                                          | Study population                         |                              | OR 0.64<br>(0.51 to 0.8) | 2742<br>(13 studies)         | ⊕⊕⊕⊖<br>moderate                |          |
|                                                              | 197 per 1000                             | 136 per 1000<br>(111 to 164) |                          |                              |                                 |          |
|                                                              | Moderate                                 |                              |                          |                              |                                 |          |
|                                                              | 216 per 1000                             | 150 per 1000<br>(123 to 181) |                          |                              |                                 |          |

\*The basis for the **assumed risk** (e.g. the median control group risk across studies) is provided in footnotes. The **corresponding risk** (and its 95% confidence interval) is based on the assumed risk in the comparison group and the **relative effect** of the intervention (and its 95% CI).

CI: Confidence interval; OR: Odds ratio;

---

GRADE Working Group grades of evidence

**High quality:** Further research is very unlikely to change our confidence in the estimate of effect.

**Moderate quality:** Further research is likely to have an important impact on our confidence in the estimate of effect and may change the estimate.

**Low quality:** Further research is very likely to have an important impact on our confidence in the estimate of effect and is likely to change the estimate.

**Very low quality:** We are very uncertain about the estimate.

**Table S14. GRADE evaluation of overall evidence for diet plus exercise intervention**

| Diet plus exercise for GDM prevention                        |                                          |                           |                          |                              |                                 |          |
|--------------------------------------------------------------|------------------------------------------|---------------------------|--------------------------|------------------------------|---------------------------------|----------|
| Patient or population: pregnant women with high risk for GDM |                                          |                           |                          |                              |                                 |          |
| Settings: outpatient                                         |                                          |                           |                          |                              |                                 |          |
| Intervention: Diet plus exercise                             |                                          |                           |                          |                              |                                 |          |
| Outcomes                                                     | Illustrative comparative risks* (95% CI) |                           | Relative effect (95% CI) | No of Participants (studies) | Quality of the evidence (GRADE) | Comments |
|                                                              | Assumed risk Control                     | Corresponding risk GDM    |                          |                              |                                 |          |
| GDM                                                          | Study population                         |                           | OR 0.7 (0.55 to 0.9)     | 7673 (18 studies)            | ⊕⊕⊕⊖ low <sup>1,2</sup>         |          |
|                                                              | 180 per 1000                             | 133 per 1000 (108 to 165) |                          |                              |                                 |          |
|                                                              | Moderate                                 |                           |                          |                              |                                 |          |
|                                                              | 255 per 1000                             | 193 per 1000 (158 to 236) |                          |                              |                                 |          |

\*The basis for the **assumed risk** (e.g. the median control group risk across studies) is provided in footnotes. The **corresponding risk** (and its 95% confidence interval) is based on the assumed risk in the comparison group and the **relative effect** of the intervention (and its 95% CI).

**CI:** Confidence interval; **OR:** Odds ratio;

GRADE Working Group grades of evidence

**High quality:** Further research is very unlikely to change our confidence in the estimate of effect.

**Moderate quality:** Further research is likely to have an important impact on our confidence in the estimate of effect and may change the estimate.

**Low quality:** Further research is very likely to have an important impact on our confidence in the estimate of effect and is likely to change the estimate.

**Very low quality:** We are very uncertain about the estimate.

---

<sup>1</sup> Significant level of heterogeneity

<sup>2</sup> Existence of publication bias
